# Supplementary material for: Analysis of the Human Kinome Using Methods Including Fold Recognition Reveals Two Novel Kinases
Source: PLOS journal article supplement (doi:10.1371/journal.pone.0001597), 2008-02-13
Supplement: S4 (10.1371/journal.pone.0001597.s004) [file journal.pone.0001597.s004]

CLUSTAL W (1.83) multiple sequence alignment

http://www.ebi.ac.uk/Tools/clustalw/index.html

CKA_H.sapiens_gi|47078276 -HISVIRGGLSNMLFQCSLPDTTATLGDEP--RKVLLRLYGAILQMRSCN

CKA_M.musculus_gi|70908364 -HISVIRGGLSNMLFQCSLPDSIASVGDEP--RKVLLRLYGAILKM----

CKB_H.sapiensÂ¬_gi|133777770 -RVYPVSGGLSNLLFRCSLPDHLPSVGEEP--REVLLRLYGAILQG----

CKB_M.musculus_gi|148672392 -SVCPVSGGLSNLLFRCSLPNHVPSVGGEP--REVLLRLYGAILQG----

CK_C.elegans_pdb_1nw1 -RISRIKGGMSNMLFLCRLSEVYPPIRNEP--NKVLLRVYFNPETE----

APH_O.alexandrii_gi|83859474 -TVEQFKGGQSNPTYKLSTPGAQYVLRRKP--PGKLLPSAHAVDREYR--

APH_M.maris_gi|114569176 -TVEQFKGGQSNPTYKLVTPGKAYVLRRKP--PGKLLPSAHAVDREFR--

APH_B.phytofirmans_gi|11803915 -TLEQFAGGQSNPTFKLLTPSRSYVMRAKPGPAAKLLPSAHAVEREYR--

ACAD10_H.sapiens_ENSP000003251 -ELLQFDHGQSNPTYYIRLANRDLVLRKKP--PGTLLPSAHAIEREFR--

APH_A.cryptum_gi|148261103 -TIRQFQGGQSNPTYLIETAARNYVLRKKP--PGTLLPSAHQIDREFR--

ACAD11_H.sapiens_ENSP000002649 -TIAQYRAGKSNPTFYLQKGFQTYVLRKKP--PGSLLPKAHQIDREFK--

CKB_C.elegans_gi|32565112 -NVSRVHGGQSNHMFHVTSSTS-----ATP----YLLRIHRQPPSQ----

APH_K.pneumoniae_pdb_1ND4 DWAQQTIGCSDAAVFRLSAQGRPVLFVKTD-----LSGALNELQDEAAR-

APH_E.faecalis_pdb_1J7L RCVKDTEGMSPAKVYKLVGENENLYLKMTD---SRYKGTTYDVEREKD--

:

CKA_H.sapiens_gi|47078276 KEGSEQAQKENEFQGAEAMVLESVMFAILAERSLGPKLYGIFPQGRLEQF

CKA_M.musculus_gi|70908364 --------------GAEAMVLESVMFAILAERSLGPKLFGIFPQGRLEQF

CKB_H.sapiensÂ¬_gi|133777770 ---------------VDSLVLESVMFAILAERSLGPQLYGVFPEGRLEQY

CKB_M.musculus_gi|148672392 ---------------VDSLVLESVMFAILAERSLGPQLYGVFPEGRLEQY

CK_C.elegans_pdb_1nw1 ----------------SHLVAESVIFTLLSERHLGPKLYGIFSGGRLEEY

APH_O.alexandrii_gi|83859474 ----------------VMKALGEQGFPAPHMFGLCEDDSVIGTAFYIMDF

APH_M.maris_gi|114569176 ----------------VMKALGGAGFPAPVMHGLCMEREVIGTEFYIMDF

APH_B.phytofirmans_gi|11803915 ----------------VMHALADTDVPVAKMLALCEDESVIGRAFYVMEF

ACAD10_H.sapiens_ENSP000003251 ----------------IMKALANAGVPVPNVLDLCEDSSVIGTPFYVMEY

APH_A.cryptum_gi|148261103 ----------------IQCALAATDVPVAPMLHYCTDAAVIGTEFYVMGH

ACAD11_H.sapiens_ENSP000002649 ----------------VQKALFSIGFPVPKPILYCSDTSVIGTEFYVMEH

CKB_C.elegans_gi|32565112 ------------------VFTDTVNLAIFSERGLGPKLYGFFEGGRMEEF

APH_K.pneumoniae_pdb_1ND4 -----------------LSWLATTGVPCAAVLDVVTEA---GRDWLLLGE

APH_E.faecalis_pdb_1J7L -----------------MMLWLEGKLPVPKVLHFERHD---GWSNLLMSE

.. . :

CKA_H.sapiens_gi|47078276 IPSRRLDTEELSLPDISAEIAEKMATFHGMKMPFNKE---PKWLFGTMEK

CKA_M.musculus_gi|70908364 IPSRRLDTEELRLPDISAEIAEKMATFHGMKMPFNKE---PKWLFGTMEK

CKB_H.sapiensÂ¬_gi|133777770 IPSRPLKTQELREPVLSAAIATKMAQFHGMEMPFTKE---PHWLFGTMER

CKB_M.musculus_gi|148672392 LPSRPLKTQELRDPVLSGAIATRMARFHGMEMPFTKE---PRWLFGTMER

CK_C.elegans_pdb_1nw1 IPSRPLSCHEISLAHMSTKIAKRVAKVHQLEVPIWKE---PDYLCEALQR

APH_O.alexandrii_gi|83859474 VAGRIFW--DPYLPDLSPDQRGAIYDASNATLAQLHS---IDHEAAGLGD

APH_M.maris_gi|114569176 VEGRIFW--DPLLPDLDKTERGAIYDASNATLAHLHG---IDFEAAGLGD

APH_B.phytofirmans_gi|11803915 VEGRVLW--DQSLPGMTPAERAAIYDEMNRVIAALHS---VDVAAVGLAD

ACAD10_H.sapiens_ENSP000003251 CPGLIYK--DPSLPGLEPSHRRAIYTAMNTVLCKIHS---VDLQAVGLED

APH_A.cryptum_gi|148261103 VAGRVFH--DVMMPGLAPEERGAIHRQIFETIAALHK---VDYNAVGLTG

ACAD11_H.sapiens_ENSP000002649 VQGRIFR--DLTIPGLSPAERSAIYVATVETLAQLRS---LNIQSLQLEG

CKB_C.elegans_gi|32565112 LPSKTFDVNDVLVPENSRKIGAIFPLYHSINVPVSKSRRCVHLMREWLNG

APH_K.pneumoniae_pdb_1ND4 VPG-----QDLLSSHLAPAEKVSIMADAMRRLHTLDP---ATCPFDHQAK

APH_E.faecalis_pdb_1J7L ADGVLCS--EEYEDEQSPEKIIELYAECIRLFHSIDIS---DCPYTNSLD

. : . .

CKA_H.sapiens_gi|47078276 YLKEVL-RIKFTEESRIKKLH---KLLSYNLPLELENLRSLLESTP-SPV

CKA_M.musculus_gi|70908364 YLNQVL-RLKFSREARVQQLH---KILSYNLPLELENLRSLLQYTR-SPV

CKB_H.sapiensÂ¬_gi|133777770 YLKQIQ-DLPPTG---LPEMN---LLEMYSLKDEMGNLRKLLESTP-SPV

CKB_M.musculus_gi|148672392 YLKQIQ-DLPSTS---LPQMN---LVEMYSLKDEMNSLRKLLDDTP-SPV

CK_C.elegans_pdb_1nw1 WLKQLTGTVDAEHRFDLPEECGVSSVNCLDLARELEFLRAHISLSK-SPV

APH_O.alexandrii_gi|83859474 YGKPGN-YFERSIGRWSKQYKAAETETVAAMDKLIEWLPEHAPAQ--ERT

APH_M.maris_gi|114569176 YGKPGN-YFERQIGRWTKQYRAAETTTVPAMDRLIEWLPTAAPDQ--ERT

APH_B.phytofirmans_gi|11803915 YGKPGN-YFARQIGRWSKQYIASETEPIDAMQRLIEWLPQHMPAETGERA

ACAD10_H.sapiens_ENSP000003251 YGKQGD-YIPRQVRTWVKQYRASETSTIPAMERLIEWLPLHLPRQ--QRT

APH_A.cryptum_gi|148261103 FGRPDH-YVARQIERWTKQYEASKTEDFAPMTDLIAWLRANIPER--DES

ACAD11_H.sapiens_ENSP000002649 YGIGAG-YCKRQVSTWTKQYQAAAHQDIPAMQQLSEWLMKNLPDND-NEE

CKB_C.elegans_gi|32565112 YESLGG-GDYEILPTTVNYSDHPKSVSIKDLNHEIDNFEKWSTEIFEHTL

APH_K.pneumoniae_pdb_1ND4 HRIERA--RTRMEAGLVDQDDLDEEHQGLAPAELFARLKARMPDG--EDL

APH_E.faecalis_pdb_1J7L SRLAELDYLLNNDLADVDCENWEEDTPFKDPRELYDFLKTEKPEE---EL

:

CKA_H.sapiens_gi|47078276 VFCHNDCQEGNILLLEGRE----------------------NSEKQKLML

CKA_M.musculus_gi|70908364 VFCHNDCQEGNILLLEGQE----------------------NSERRKLML

CKB_H.sapiensÂ¬_gi|133777770 VFCHNDIQEGNILLLSEPE----------------------NAD--SLML

CKB_M.musculus_gi|148672392 VFCHNDIQEGNILLLSEPD----------------------SDD--NLML

CK_C.elegans_pdb_1nw1 TFCHNDLQEGNILLPKASSGNIRMPSLSDETQALGNSLSAFNPADPRLVL

APH_O.alexandrii_gi|83859474 SVVHGDYRLDNMIFHPTEP--------------------------RVIAV

APH_M.maris_gi|114569176 SVVHGDYRLDNMVFHPTEP--------------------------RVIAV

APH_B.phytofirmans_gi|11803915 SVVHGDYRLDNLIFHPEEP--------------------------RVLAV

ACAD10_H.sapiens_ENSP000003251 TVVHGDFRLDNLVFHPEEP--------------------------EVLAV

APH_A.cryptum_gi|148261103 AIVHGDFRLGNMMIHPTEP--------------------------RIVAV

ACAD11_H.sapiens_ENSP000002649 NLIHGDFRLDNIVFHPKEC--------------------------RVIAV

CKB_C.elegans_gi|32565112 VFSHNDLASTNILELNSTK---------------------------ELVL

APH_K.pneumoniae_pdb_1ND4 VVTHGDACLPNIMVENGRFS----------------------------GF

APH_E.faecalis_pdb_1J7L VFSHGDLGDSNIFVKDGKVS----------------------------GF

. *.* *:. .

CKA_H.sapiens_gi|47078276 IDFEYSSYNYRGFDIGNHFCEWMYDY----SYEKYPFFRANIRKYPTKKQ

CKA_M.musculus_gi|70908364 IDFEYSSYNYRGFDIGNHFCEWMYDY----TYEKYPFFRANIQKYPSRKQ

CKB_H.sapiensÂ¬_gi|133777770 VDFEYSSYNYRGFDIGNHFCEWVYDY----THEEWPFYKARPTDYPTQEQ

CKB_M.musculus_gi|148672392 VDFEYSSYNYRGFDIGNHFCEWVYDY----TYEEWPFYKARPTDYPTREQ

CK_C.elegans_pdb_1nw1 IDFEYASYNYRAFDFANHFIEWTIDY----DIDEAPFYKIQTENFPENDQ

APH_O.alexandrii_gi|83859474 LDWELSTLGDPLADFTYQLMQWRTPK---DIRNGFLGQDLKAMGIPTEEE

APH_M.maris_gi|114569176 LDWELSTLGDPLADFTYQLMGWVMPP---EIRNGLLGVDIASLGIPDIEQ

APH_B.phytofirmans_gi|11803915 LDWELSTLGDPLADFAYHCMAWHVDP---AQFRGIAGLDWVTLGIPDEQQ

ACAD10_H.sapiens_ENSP000003251 LDWELSTLGDPLADVAYSCLAHYLPSSF-PVLRGINDCDLTQLGIPAAEE

APH_A.cryptum_gi|148261103 LDWELSTIGHPLADLAYCCMSYHLPPGSGPAMAGYQGVDLAELGLMSEAE

ACAD11_H.sapiens_ENSP000002649 LDWELSTIGHPLSDLAHFSLFYFWPR---TVPMINQGSYSENSGIPSMEE

CKB_C.elegans_gi|32565112 IDWEFGTYNWRGFDLAMHLSETAIDY----RVPFPPGIKMNGDLIDNPPN

APH_K.pneumoniae_pdb_1ND4 IDCGRLGVADRYQDIALATRDIAEELGGEWADRFLVLYGIAAPDSQRIAF

APH_E.faecalis_pdb_1J7L IDLGRSGRADKWYDIAFCVRSIREDIGEEQYVELFFDLLGIKPDWEKIKY

:* *.

CKA_H.sapiens_gi|47078276 ------------------

CKA_M.musculus_gi|70908364 ------------------

CKB_H.sapiensÂ¬_gi|133777770 ------------------

CKB_M.musculus_gi|148672392 ------------------

CK_C.elegans_pdb_1nw1 ------------------

APH_O.alexandrii_gi|83859474 YVKAYCERTGRNGIPKLD

APH_M.maris_gi|114569176 Y-----------------

APH_B.phytofirmans_gi|11803915 Y-----------------

ACAD10_H.sapiens_ENSP000003251 Y-----------------

APH_A.cryptum_gi|148261103 AL----------------

ACAD11_H.sapiens_ENSP000002649 L-----------------

CKB_C.elegans_gi|32565112 ------------------

APH_K.pneumoniae_pdb_1ND4 Y-----------------

APH_E.faecalis_pdb_1J7L Y-----------------

**Supplementary Figure S1**
